# Supplementary material for: Многофакторный анализ генетических соотношений популяций Центральной России
Source: Royal Society of Chemistry journal article supplement (doi:10.1039/d4ra05590j), 2009-01-01
Supplement: d4ra05590j1.pdf [file d4ra05590j1.pdf]

Calibration Data for calculating MEA Concentration:

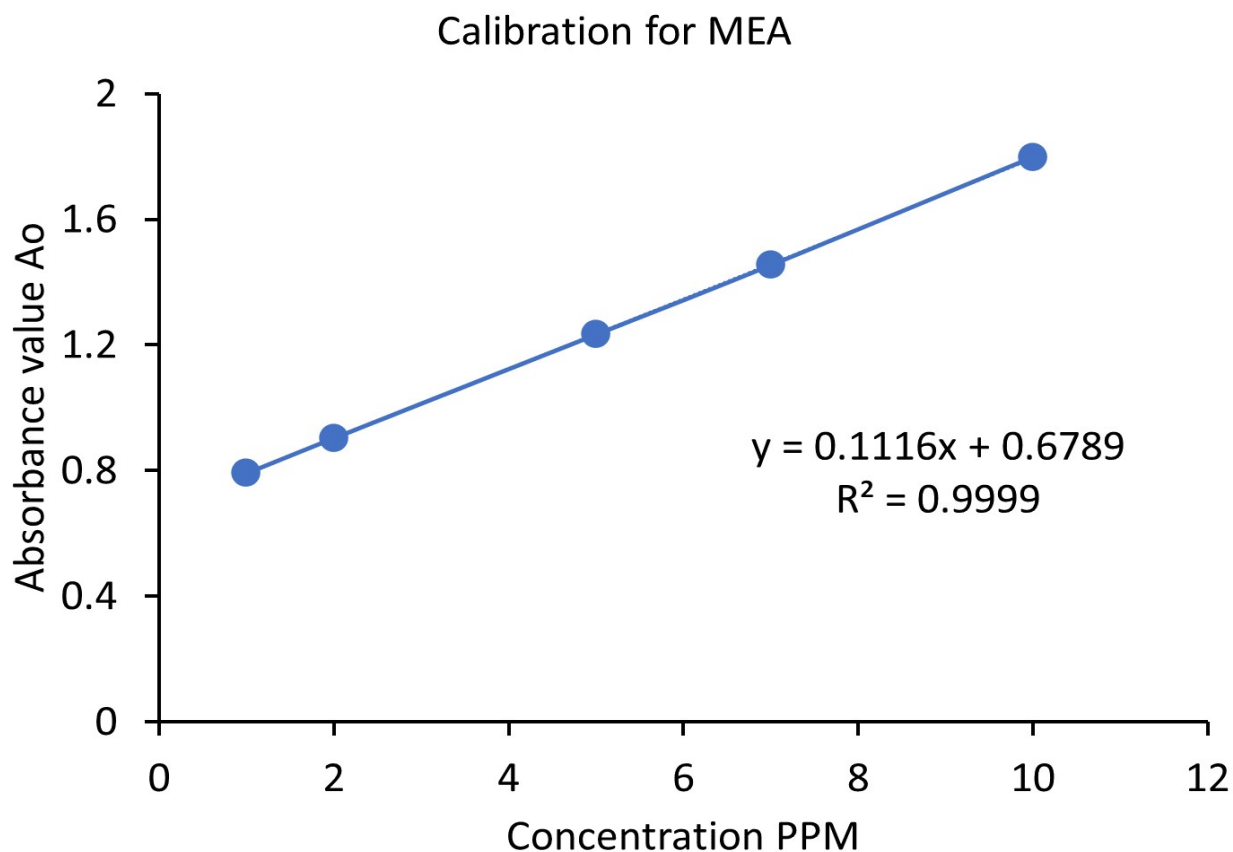

**Figure S1: Calibration curve generated from UV-Visible Spectrophotometer for calculation of MEA Concentration**

#### **Chemicals and reagents:**

MEA, with a minimum purity of 99%, was purchased from Sigma Aldrich for use in the experimental investigation. H<sub>2</sub>O<sub>2</sub> obtained as a 30% solution, was sourced from Sigma Aldrich and utilized as an oxidant in the advanced oxidation process. Formic acid and Acetonitrile for elution solvents (LCMS grade) are also purchased from Sigma Aldrich.

#### **Optimized Parameters for LCMS:**

For MEA degradation mechanisms and products following are the optimized parameters for LC (liquid chromatography) and MS (mass spectrometer)

**Column Specifications:**

Chromatographic separation is achieved using a reversed-phase C-18 column (YMC-Triart, 150 x 2.0 mm, 5  $\mu\text{m}$  particle size). The software used for data analysis was Agilent Mass Hunter. Electrospray Ionization (ESI) mode of ionization was employed.

**Table S1: Optimized parameters of LC**

| Eluent                                    | 0.1 % formic acid, acetonitrile |                                     |
|-------------------------------------------|---------------------------------|-------------------------------------|
| Mobile phase gradient                     | Time (min)                      | Mobile phase ratio (% Acetonitrile) |
|                                           | 0                               | 10                                  |
|                                           | 0.8                             | 10                                  |
|                                           | 1.5                             | 90                                  |
|                                           | 3                               | 90                                  |
|                                           | 4                               | 10                                  |
|                                           | 10                              | 10                                  |
| Flow rate (ml/min)                        | 0.5                             |                                     |
| Injection volume ( $\mu\text{L}$ )        | 30                              |                                     |
| Column temperature ( $^{\circ}\text{C}$ ) | 30                              |                                     |

**Table S2: Optimized parameters for MS**

| Parameter                   | Value |
|-----------------------------|-------|
| Drying gas temperature (°C) | 300   |
| Nebulizer pressure (psi)    | 15    |
| Gas flow (Liters/min)       | 6     |
| Capillary voltage (V)       | 4000  |

**Table S3: MEA Degradation products and their retention times**

| MEA                                      | Degradation Products                                            | Retention Time |
|------------------------------------------|-----------------------------------------------------------------|----------------|
| $\text{OH-CH}_2\text{-CH}_2\text{-NH}_2$ | Ethylene Glycol<br>( $\text{OH-CH}_2\text{-CH}_2\text{-OH}^*$ ) | 0.62           |
|                                          | Glyco-aldehyde<br>( $\text{HO-CH}_2\text{-CHO}$ )               | 0.97           |
|                                          | Glycine aldehyde<br>( $\text{NH}_2\text{-CH}_2\text{-CHO}$ )    | 1.23           |
|                                          | Glycine ( $\text{NH}_2\text{-CH}_2\text{-COOH}$ )               | 1.78           |

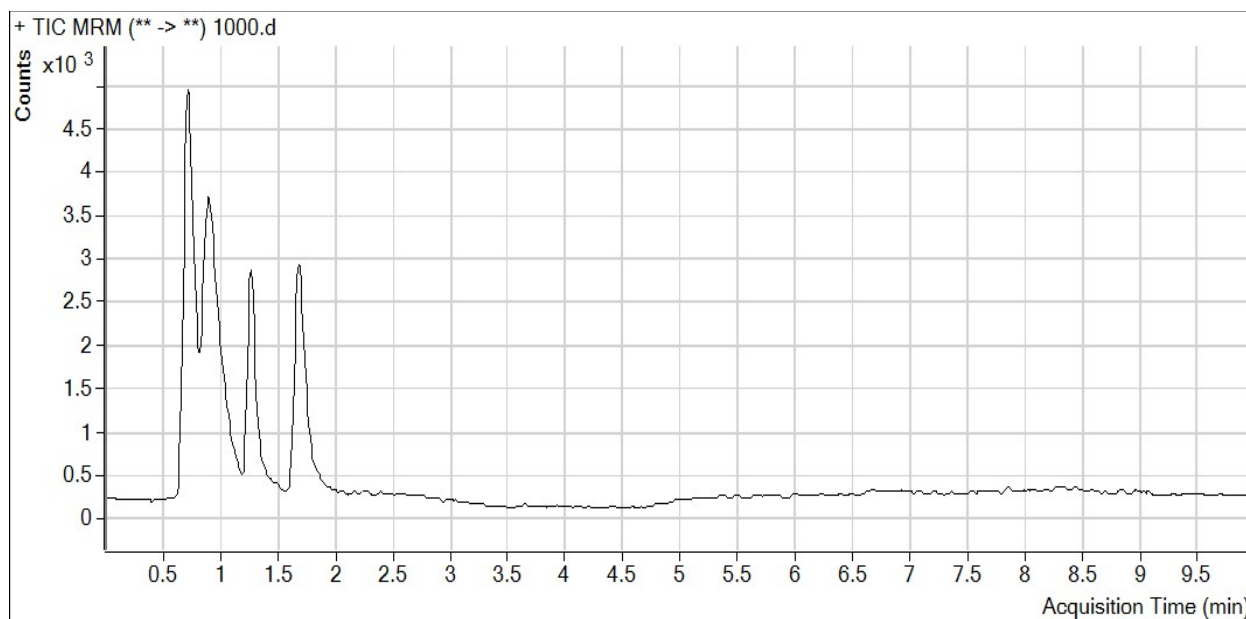

Figure S2: LCMS Chromatograms for MEA Degradation Products

**Carbon dioxide (CO<sub>2</sub>) and Ammonium ion (NH<sub>4</sub><sup>+</sup>) are detected in aqueous samples by titration method**

**Procedure for CO<sub>2</sub> detection:**

- The CO<sub>2</sub> in the aqueous sample is absorbed using sodium hydroxide (NaOH). When CO<sub>2</sub> and NaOH reacted, sodium bicarbonate is formed
- Pass the sample through an absorption solution of sodium hydroxide (NaOH) to capture CO<sub>2</sub>.
- To the mixture, a few drops of phenolphthalein are added. When phenolphthalein is dissolved in basic solutions, it turns pink and turns colorless when neutralized with acid.
- A standard hydrochloric acid (HCl) solution is used to titrate the above solution.
- Following reaction takes place during titration

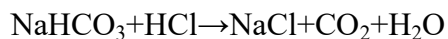

### Procedure for Ammonium ion (NH<sub>4</sub><sup>+</sup>) detection

- Dilute hydrochloric acid (HCl) 0.1 M solution is used to absorb the solution resulting in the formation of NH<sub>4</sub>Cl
- Sodium hydroxide (NaOH) is used, to titrate the above solution.
- Before titration Methyl orange is added in the solution
- Titration is continued until the color of the solution is changed
- Following reaction takes place during titration

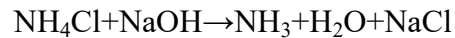

### Calculation of UV light intensities and electrical energy per order of reaction:

UV light intensity and Electrical energy per order (EE/O) values are calculated by using the equations mentioned in section 2.3. The UV light intensities and EE/O are calculated at maximum degradation efficiency which was 77.34% at room temperature, pH = 9.4 and total reaction time = 60 minutes in our previous work[1]. The measured initial and final concentration values at these conditions were 9.10 mg/L and 2.06 mg/L.

#### UV Intensity and electrical energy per order for 4W UV light:

##### UV light intensity

Area of the base of solution container ( $A_b$ ) = 44.1964 cm<sup>2</sup> ( $r = 3.75$  cm,  $\pi = 3.142$ )

Lateral surface area of solution container ( $A_{LSA}$ ) = 209.785 cm<sup>2</sup> ( $r = 3.75$  cm,  $\pi = 3.142$ ,  $h = 8.9$ cm)

Total exposed area of UV light ( $A_{ex}$ ) = 254 cm<sup>2</sup>

UV light Intensity =  $(4/254) * 1000 = 15.748$  mJ/cm<sup>2</sup>

##### EE/O at highest removal efficiency

Reaction order ( $n$ ) = 1, Rated Power of UV lamp ( $P_{el}$ ) = 0.004KW, Volume the solution ( $V$ ) = 0.5L, exposure time ( $t$ ) = 60 min and  $\log(C_0/C) = 0.65$

EE/O =  $0.004 * 60 * (0.5 * 0.65) = 0.325$  kWh/L = 325 kWh/m<sup>3</sup>

#### UV Intensity and electrical energy per order for 6W UV light:

##### UV light intensity

Area of the base of solution container ( $A_b$ ) = 44.1964 cm<sup>2</sup> ( $r = 3.75$  cm,  $\pi = 3.142$ )

Lateral surface area of solution container ( $A_{LSA}$ ) = 209.785 cm<sup>2</sup> ( $r = 3.75$  cm,  $\pi = 3.142$ ,  $h = 8.9$ cm)

Total exposed area of UV light ( $A_{ex}$ ) = 254 cm<sup>2</sup>

UV light Intensity =  $(6/254) * 1000 = 23.622$  mJ/cm<sup>2</sup>

##### EE/O at highest removal efficiency

Reaction order ( $n$ ) = 1, Rated Power of UV lamp ( $P_{el}$ ) = 0.006KW, Volume the solution ( $V$ ) =

0.5L, exposure time (t) = 60 min and  $\log(C_0/C) = 0.68$   
 $EE/O = 0.006 \cdot 60 / (0.5 \cdot 0.68) = 0.34 \text{ kWh/L} = 340 \text{ kWh/m}^3$

### **UV Intensity and electrical energy per order for 8W UV light:**

#### **UV light intensity**

Area of the base of solution container ( $A_b$ ) = 44.1964 cm<sup>2</sup> (r = 3.75 cm,  $\pi = 3.142$ )  
Lateral surface area of solution container ( $A_{LSA}$ ) = 209.785 cm<sup>2</sup> (r = 3.75 cm,  $\pi = 3.142$ , h = 8.9cm)  
Total exposed area of UV light ( $A_{ex}$ ) = 254 cm<sup>2</sup>  
UV light Intensity =  $(8/254) \cdot 1000 = 31.496 \text{ mJ/cm}^2$

#### **EE/O at highest removal efficiency**

Reaction order (n) = 1, Rated Power of UV lamp ( $P_{el}$ ) = 0.008KW, Volume the solution (V) = 0.5L, exposure time (t) = 60 min and  $\log(C_0/C) = 0.75$   
 $EE/O = 0.008 \cdot 60 / (0.5 \cdot 0.75) = 0.375 \text{ kWh/L} = 375 \text{ kWh/m}^3$

### **UV Intensity and electrical energy per order for 10W UV light:**

#### **UV light intensity**

Area of the base of solution container ( $A_b$ ) = 44.1964 cm<sup>2</sup> (r = 3.75 cm,  $\pi = 3.142$ )  
Lateral surface area of solution container ( $A_{LSA}$ ) = 209.785 cm<sup>2</sup> (r = 3.75 cm,  $\pi = 3.142$ , h = 8.9cm)  
Total exposed area of UV light ( $A_{ex}$ ) = 254 cm<sup>2</sup>  
UV light Intensity =  $(10/254) \cdot 1000 = 39.370 \text{ mJ/cm}^2$

#### **EE/O at highest removal efficiency**

Reaction order (n) = 1, Rated Power of UV lamp ( $P_{el}$ ) = 0.008KW, Volume the solution (V) = 0.5L, exposure time (t) = 60 min and  $\log(C_0/C) = 0.81$   
 $EE/O = 0.01 \cdot 60 / (0.5 \cdot 0.81) = 0.405 \text{ kWh/L} = 405 \text{ kWh/m}^3$

### **UV Intensity and electrical energy per order for 15W UV light:**

#### **UV light intensity**

Area of the base of solution container ( $A_b$ ) = 44.1964 cm<sup>2</sup> (r = 3.75 cm,  $\pi = 3.142$ )  
Lateral surface area of solution container ( $A_{LSA}$ ) = 209.785 cm<sup>2</sup> (r = 3.75 cm,  $\pi = 3.142$ , h = 8.9cm)  
Total exposed area of UV light ( $A_{ex}$ ) = 254 cm<sup>2</sup>  
UV light Intensity =  $(15/254) \cdot 1000 = 59.055 \text{ mJ/cm}^2$

### **EE/O at highest removal efficiency**

Reaction order (n) = 1, Rated Power of UV lamp ( $P_{el}$ ) = 0.008KW, Volume the solution (V) = 0.5L, exposure time (t) = 60 min and  $\log(C_0/C) = 0.88$

$$EE/O = 0.015 \cdot 60 / (0.5 \cdot 0.88) = 0.44 \text{ kWh/L} = 440 \text{ kWh/m}^3$$

### **References:**

1. Khan, A., et al., *Mono-ethanolamine breakdown by UV/hydrogen peroxide via MEA photolysis: kinetics, energy rate/order and degradation efficiency for mono-ethanolamine wastewater treatment*. Brazilian Journal of Chemical Engineering, 2024: p. 1-12.
